# Supplementary material for: Simultaneous in vivo monitoring of multiple brain metals using an online microdialysis-in-loop solid phase extraction-inductively coupled plasma mass spectrometry system
Source: Royal Society of Chemistry journal article supplement (doi:10.1039/c1ja10168d), 2011-10-26
Supplement: c1ja10168d.pdf [file c1ja10168d.pdf]

## Supplementary Information

### **Simultaneous *in vivo* monitoring of multiple brain metals using an online microdialysis–in-loop solid phase extraction–inductively coupled plasma mass spectrometry system**

Cheng-Kuan Su,<sup>1</sup> Yan-Ling Lin,<sup>1</sup> and Yuh-Chang Sun<sup>1,2\*</sup>

Department of Biomedical Engineering and Environmental Sciences<sup>1</sup> and Nuclear Science and Technology Development Center<sup>2</sup>, National Tsing-Hua University, 30013 Hsinchu, Taiwan

The operation sequences of the developed online MD/in-loop PTFE SPE/ICP-MS system for the determination of trace elements in the dialysates are indicated below.

Step A (1A2A3A): Loading buffered microdialysate into PTFE tubing (600 s)

Step B (1A2B3A): Removing waste (90 s)

Step C (1A2B3B): Detaching the analyte and deliver to ICP-MS (120 s)

Step D (1B2B3B): Replacing HNO<sub>3</sub> in PTFE tubing using an air carrier stream (30 s)
